# Supplementary material for: Synthesis of functionalized poly(vinyl acetate) mediated by alkyne-terminated RAFT agents
Source: Royal Society of Chemistry journal article supplement (doi:10.1039/c5ra15580k), 2015-01-01
Supplement: c5ra15580k3.pdf [file c5ra15580k3.pdf]

## *Supporting Information*

### **Synthesis of functionalized poly(vinyl acetate) mediated by alkyne-terminated RAFT agents**

**Joana R. Góis,<sup>a</sup> Anatoliy V. Popov,<sup>b</sup> Tamaz Guliashvili,<sup>c</sup> Arménio C. Serra,<sup>a</sup> Jorge F. J. Coelho<sup>a\*</sup>**

<sup>a</sup> CEMUC, Department of Chemical Engineering, University of Coimbra, Polo II, Rua Sílvio Lima, 3030-790 Coimbra, Portugal. Fax: +351 239 798 703; Tel: +351 239 798 764; E-mail: [jcoelho@eq.uc.pt](mailto:jcoelho@eq.uc.pt)

<sup>b</sup> Department of Radiology, University of Pennsylvania, Philadelphia, PA19104, United States.

<sup>c</sup> Home Address: 1761 Foster Street, F5B, Philadelphia PA 19116, United States. E-mail: [tamazguliashvili@yahoo.com](mailto:tamazguliashvili@yahoo.com)

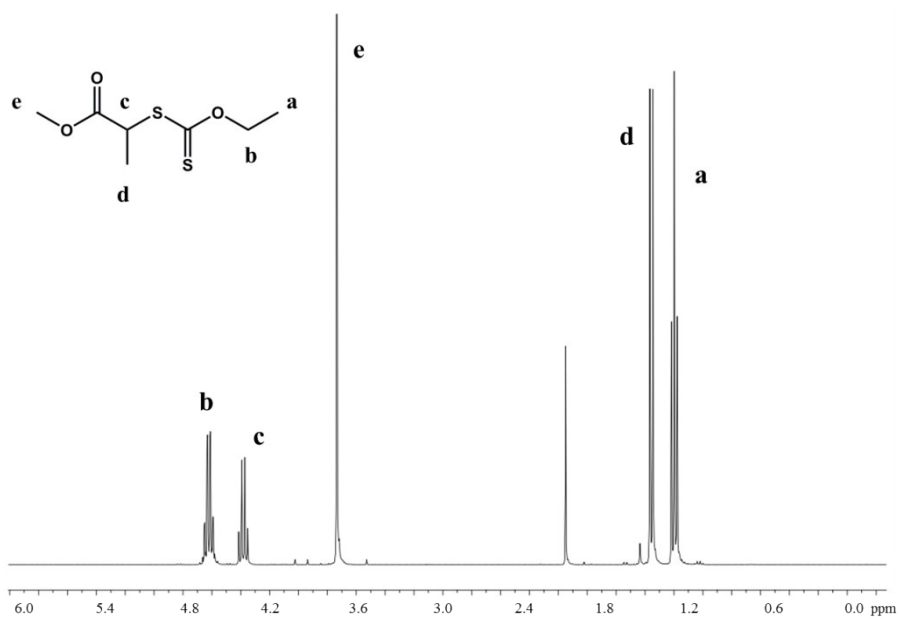

**Fig. S1:**  $^1\text{H}$  NMR spectrum of X1 in  $\text{CDCl}_3$ .

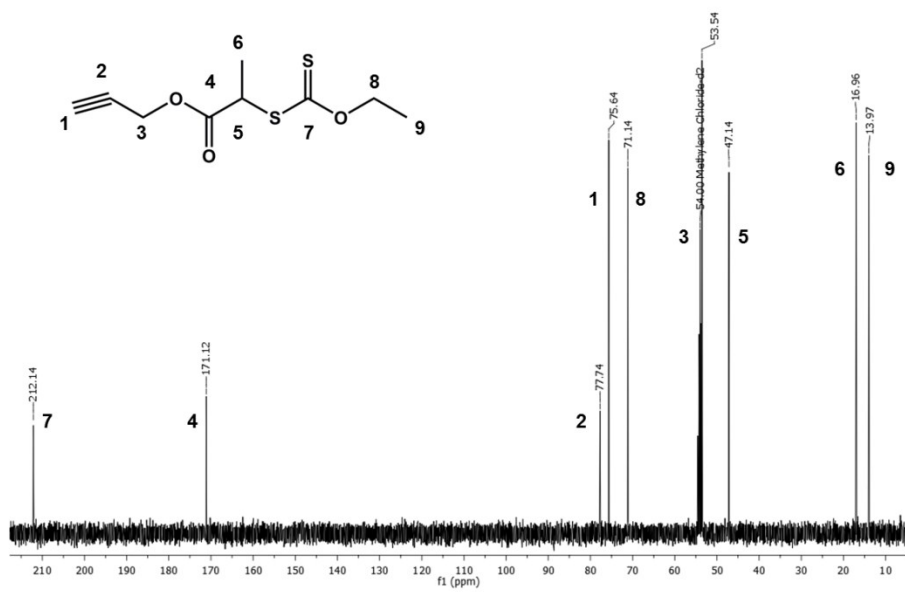

**Fig. S2:**  $^{13}\text{C}$  NMR spectrum of AT-X1 in  $\text{CD}_2\text{Cl}_2$ .

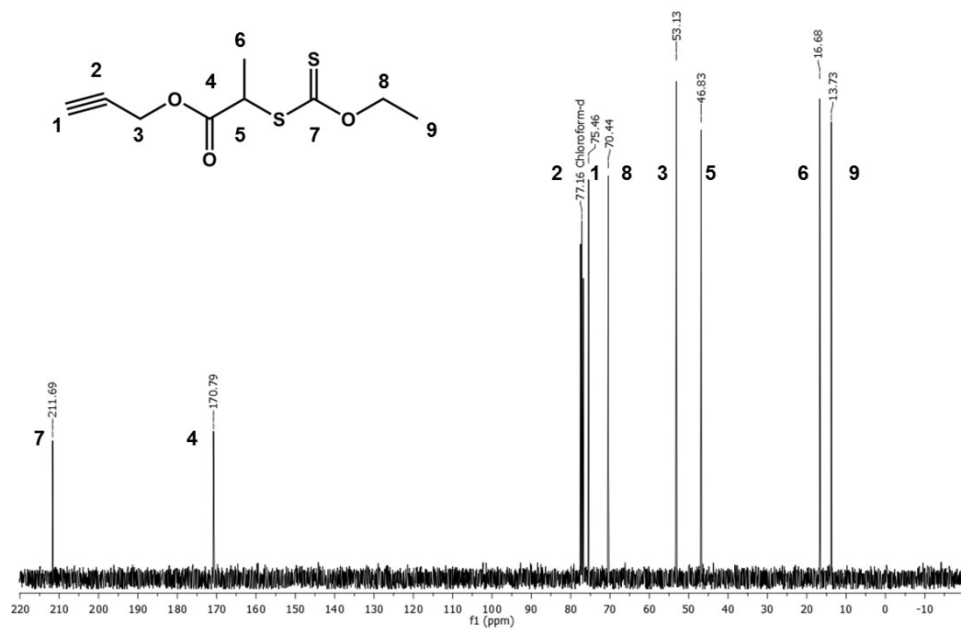

**Fig. S3:** <sup>13</sup>C NMR spectrum of AT-X<sub>1</sub> in CDCl<sub>3</sub>.

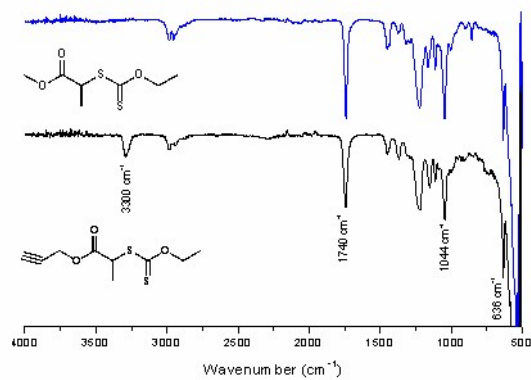

**Fig. S4:** FTIR-ATR spectra of the X<sub>1</sub> and AT-X<sub>1</sub>.

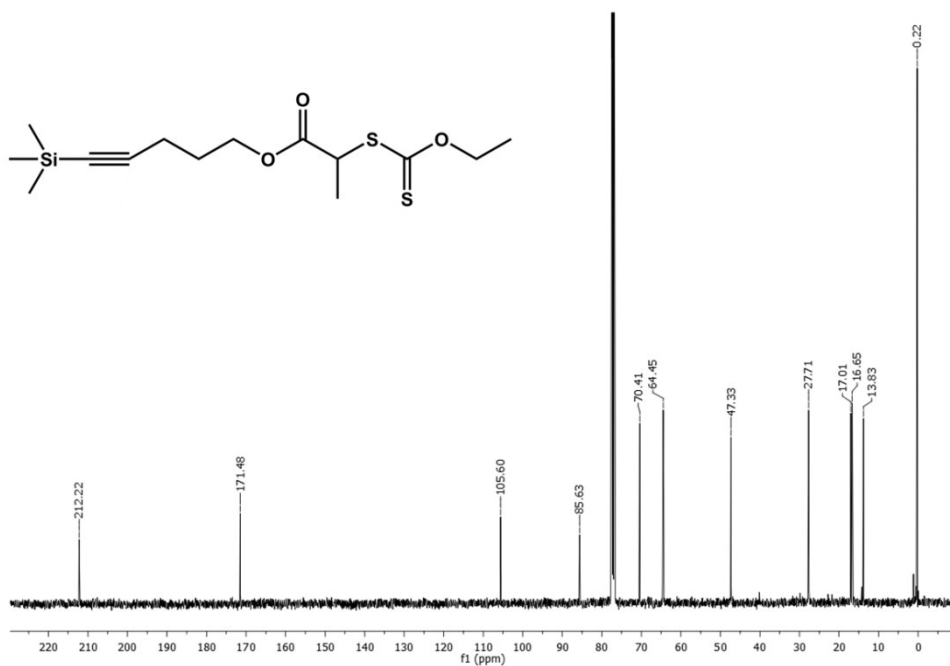

**Fig. S5:**  $^{13}\text{C}$  NMR spectrum of PAT- $X_1$  in  $\text{CDCl}_3$ .

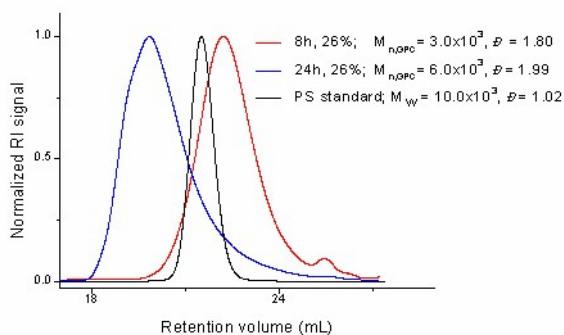

**Fig. S6:** GPC traces of poly(styrene) (PS) standard ( $M_p = 10\,050\text{ gmol}^{-1}$ ;  $D = 1.02$ ) and PVAc samples taken at different times of reaction. Conditions:  $[\text{VAc}]_0/[\text{1,4-dioxane}]_0 = 1/1$  (m/m);  $[\text{VAc}]_0/[\text{AT-}X_1]_0/[\text{AIBN}]_0 = 100/1/0.2$ ,  $T = 60\text{ }^\circ\text{C}$ .

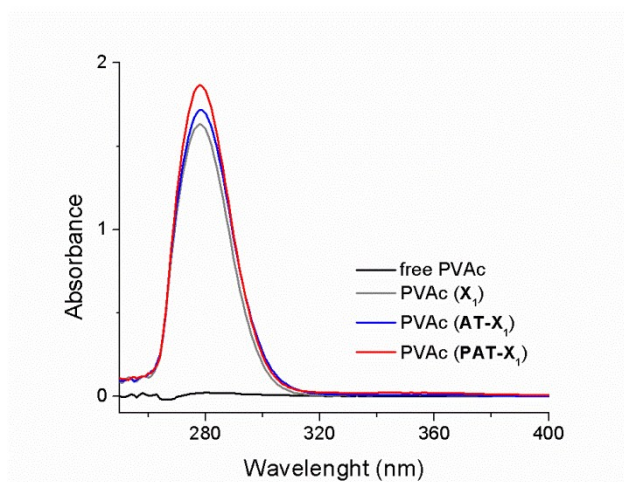

**Fig. S7:** UV-vis spectra of free-PVAc and PVAc synthesised through RAFT polymerization using the different RAFT agents: X<sub>1</sub>, AT- X<sub>1</sub> and PAT- X<sub>1</sub> respectively. Samples with 1.5 mg.mL<sup>-1</sup> concentration in CHCl<sub>3</sub>.

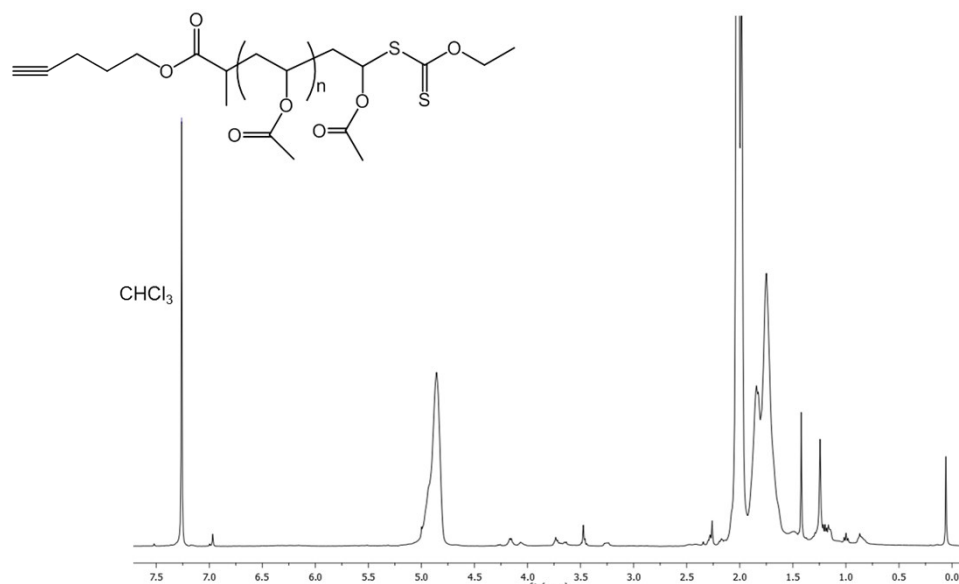

**Fig. S8:** <sup>1</sup>H NMR spectrum of PVAc after the deprotection of the alkyne moiety in CDCl<sub>3</sub>.

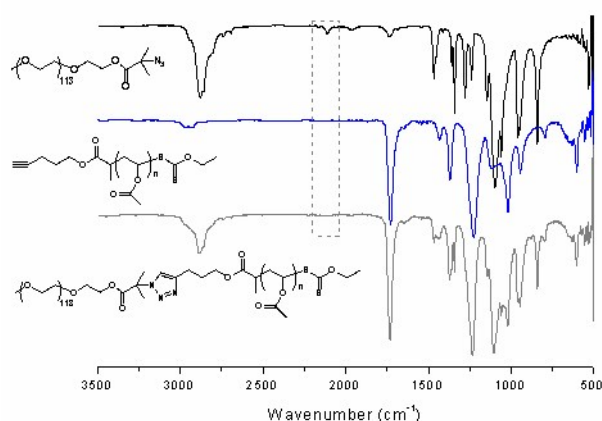

**Fig. S9:** FTIR-ATR spectra of the azido terminated-poly(ethylene glycol) (mPEG<sub>113</sub>-N<sub>3</sub>), alkyne terminated PVAc and the copolymer mPEG<sub>113</sub>-*b*-PVAc after the coupling reaction.

### Synthesis of azido terminated-poly(ethylene glycol) (mPEG<sub>113</sub>-N<sub>3</sub>)

mPEG<sub>113</sub>-N<sub>3</sub> was synthesized from poly(ethylene glycol) methyl ether bromoisobutyrate (PEG<sub>113</sub>-BiB) by a nucleophilic substitution with sodium azide (NaN<sub>3</sub>). NaN<sub>3</sub> (2.04 g, 31.43 mmol) was added to a solution of mPEG<sub>113</sub>-BiB (4.00 g, 0.79 mmol) in DMF (60 mL) and the reaction proceeded for 24h at 85 °C. The final reaction mixture was dialyzed against deionized water, and the polymer was isolated after freeze drying. <sup>1</sup>H NMR (400 MHz, CDCl<sub>3</sub>) (Figure S10): δ (ppm) 4.32 (t, 2H, -O-CH<sub>2</sub>-), 3.4 (m, 454H, (-O-CH<sub>2</sub>-CH<sub>2</sub>-)<sub>113</sub>), 3.37 (s, 3H, -CH<sub>3</sub>), 1.48 (s, 6H, -(CH<sub>3</sub>)<sub>2</sub>N<sub>3</sub>).

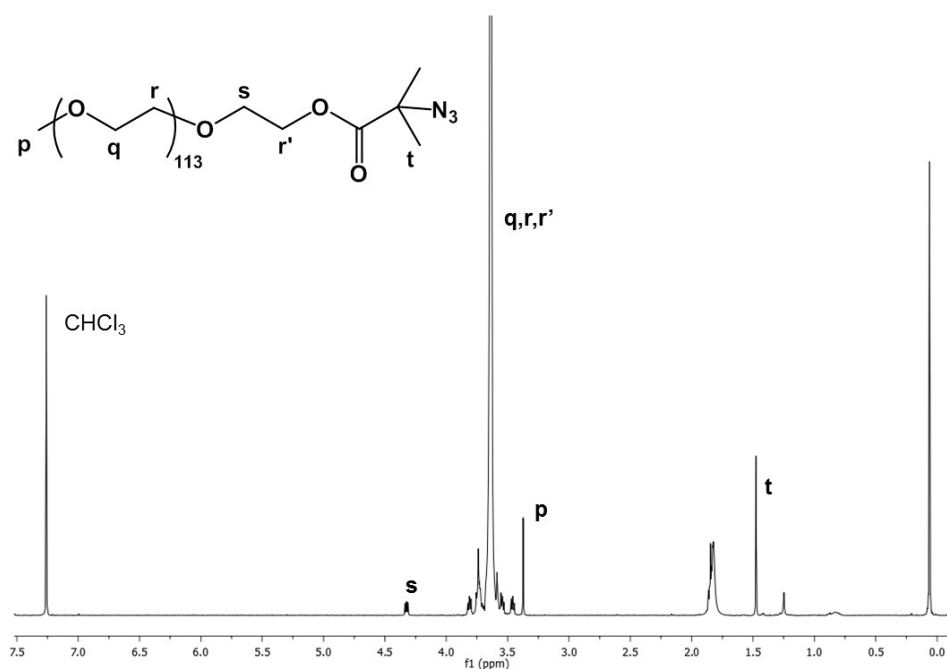

**Fig. S10:** <sup>1</sup>H NMR spectrum of azido terminated-poly(ethylene glycol) (mPEG<sub>113</sub>-N<sub>3</sub>) in CDCl<sub>3</sub>.
