# Supplementary figures and images for: Synthesis of functionalized poly(vinyl acetate) mediated by alkyne-terminated RAFT agents
Source: Royal Society of Chemistry journal article supplement (doi:10.1039/c5ra15580k), 2015-01-01

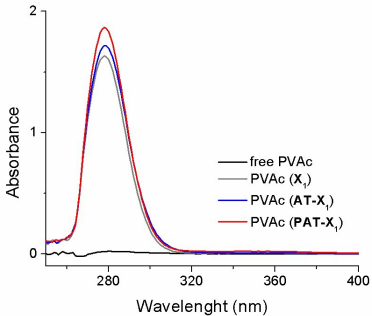

Supplement: c5ra15580k2.pdf [file c5ra15580k2.pdf]
